# Supplementary material for: Chlorella sp.-ameliorated undesirable microenvironment promotes diabetic wound healing
Source: PubMed Central journal article supplement — Acta Pharm Sin B. 2022 Jun 23;13(1):410–24. doi: 10.1016/j.apsb.2022.06.012 (PMC9939294; doi:10.1016/j.apsb.2022.06.012), 2022-06-23
Supplement: mmc1.pdf [file mmc1.pdf]

## Supporting information for

## ORIGINAL ARTICLE

### ***Chlorella* sp.-ameliorated undesirable microenvironment promotes diabetic wound healing**

Hangyi Wu<sup>a</sup>, Pei Yang<sup>a</sup>, Aiqin Li<sup>a</sup>, Xin Jin<sup>a,b</sup>, Zhenhai Zhang<sup>c,d,\*</sup>, HuiXia Lv<sup>a,\*</sup>

<sup>a</sup>*Department of Pharmaceutics, China Pharmaceutical University, Nanjing 211198, China*

<sup>b</sup>*The Affiliated Suqian First People's Hospital of Nanjing Medical University, Suqian 223800, China*

<sup>c</sup>*Jiangsu Province Academy of Traditional Chinese Medicine, Nanjing 210023, China*

<sup>d</sup>*Affiliated Hospital of Integrated Traditional Chinese and Western Medicine, Nanjing University of Chinese Medicine, Nanjing 210028, China*

Received 8 February 2022; received in revised form 29 April 2022; accepted 12 May 2022

\*Corresponding authors. Tel./fax: +86 13912965842 (Huixia Lv); +86 18913823932 (Zhenhai Zhang).

E-mail addresses: Lvhuixia@163.com (Huixia Lv), david23932@163.com (Zhenhai Zhang).

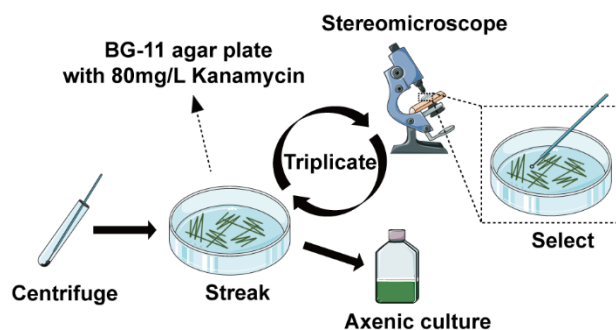

**Figure S1** Schematic diagram of *Chlorella* axenic culture.

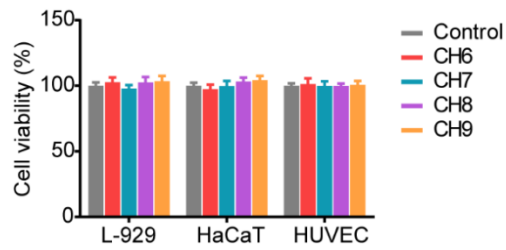

**Figure S2** Cytotoxicity of Chlorella hydrogels on L-929, HaCaT and HUVEC cells for 24 h, dark. Data are presented as mean  $\pm$  SD ( $n = 6$ ).

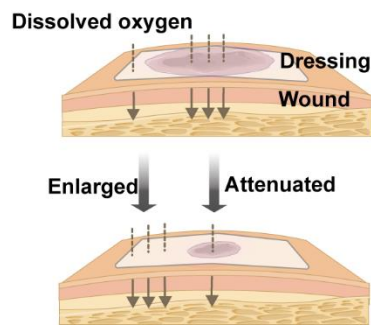

**Figure S3** Schematic diagram of dissolved oxygen delivery from hydrogels to the wound area.

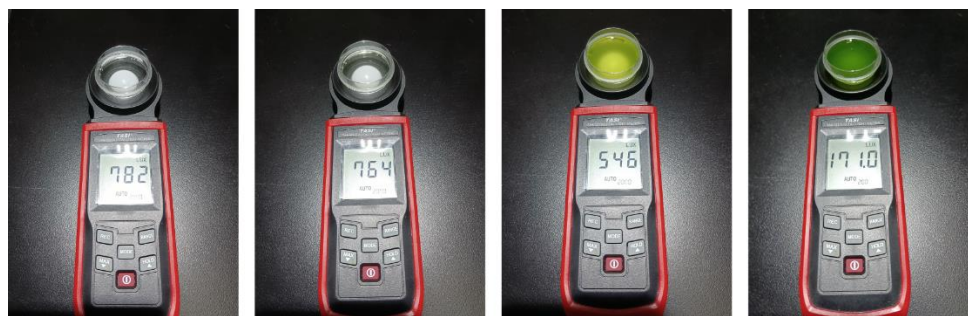

**Figure S4** Light intensity attenuation by Chlorella hydrogels, left to right: CH6, CH7, CH8 and CH9.

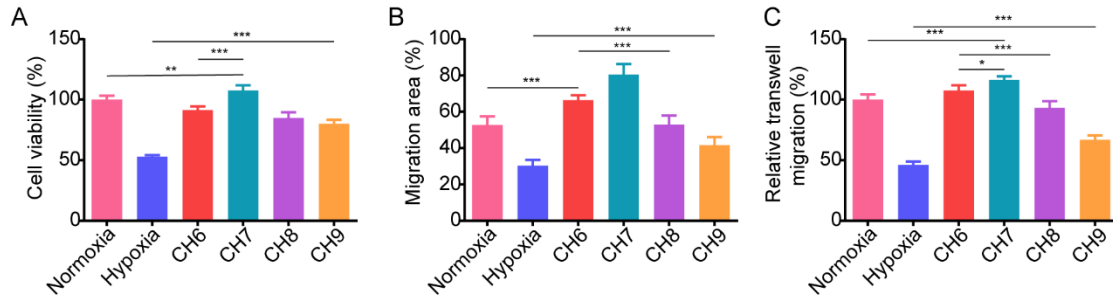

**Figure S5** Quantitative analysis of (A) L-929 cell proliferation, (B) HaCaT migration and (C) transwell migration of HUVEC with Chlorella hydrogels in hypoxia condition by ImageJ software, 37 °C, 800 lx. Data are presented as mean  $\pm$  SD ( $n = 5$ ); \*\*\* $P < 0.001$ , \*\* $P < 0.01$ , \* $P < 0.05$ , marked necessarily.

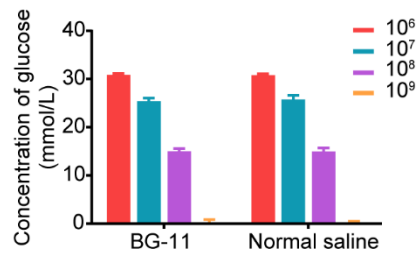

**Figure S6** Glucose remaining in the BG-11 medium (with 33 mmol/L glucose) with/without nitrogen supplement after 12 h incubation, 37 °C, 800 lx. The concentrations of Chlorella were  $1 \times 10^6$ ,  $1 \times 10^7$ ,  $1 \times 10^8$  and  $1 \times 10^9$  cell/mL. Data are presented as mean  $\pm$  SD ( $n = 6$ ).

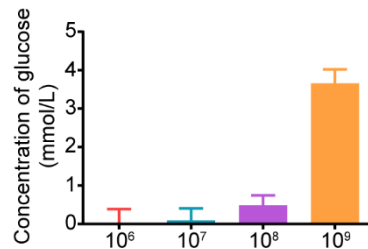

**Figure S7** The inherent glucose of Chlorella. The concentrations of Chlorella were  $1 \times 10^6$ ,  $1 \times 10^7$ ,  $1 \times 10^8$  and  $1 \times 10^9$  cell/mL. Data are presented as mean  $\pm$  SD ( $n = 6$ ).

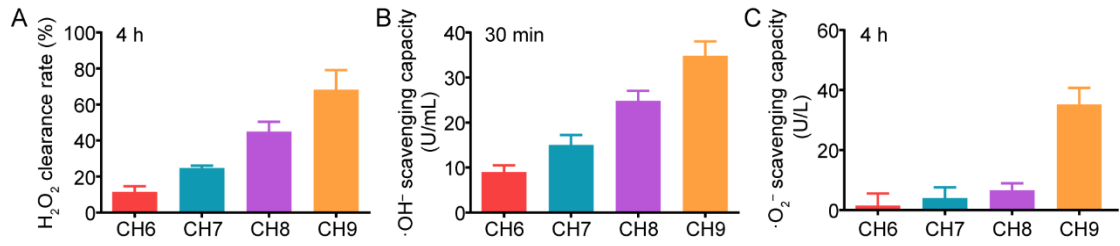

**Figure S8** (A) The depletion of H<sub>2</sub>O<sub>2</sub> and (B, C) the inhibition of ·OH<sup>-</sup>/·O<sub>2</sub><sup>-</sup> generation by Chlorella hydrogels in transwell, 37 °C, dark, respectively. Data are presented as mean ± SD (*n* = 6).

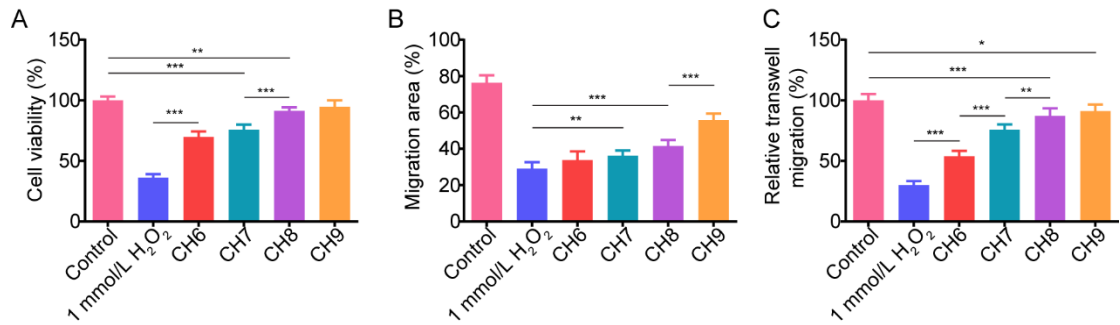

**Figure S9** Quantitative analysis of (A) L-929 cell proliferation, (B) HaCaT migration and (C) transwell migration of HUVEC by ImageJ software, 37 °C, dark. The concentration of H<sub>2</sub>O<sub>2</sub> in the cell culture medium was 1 mmol/L. Data are presented as mean ± SD (*n* = 5); \*\*\**P* < 0.001, \*\**P* < 0.01, \**P* < 0.05, marked necessarily.

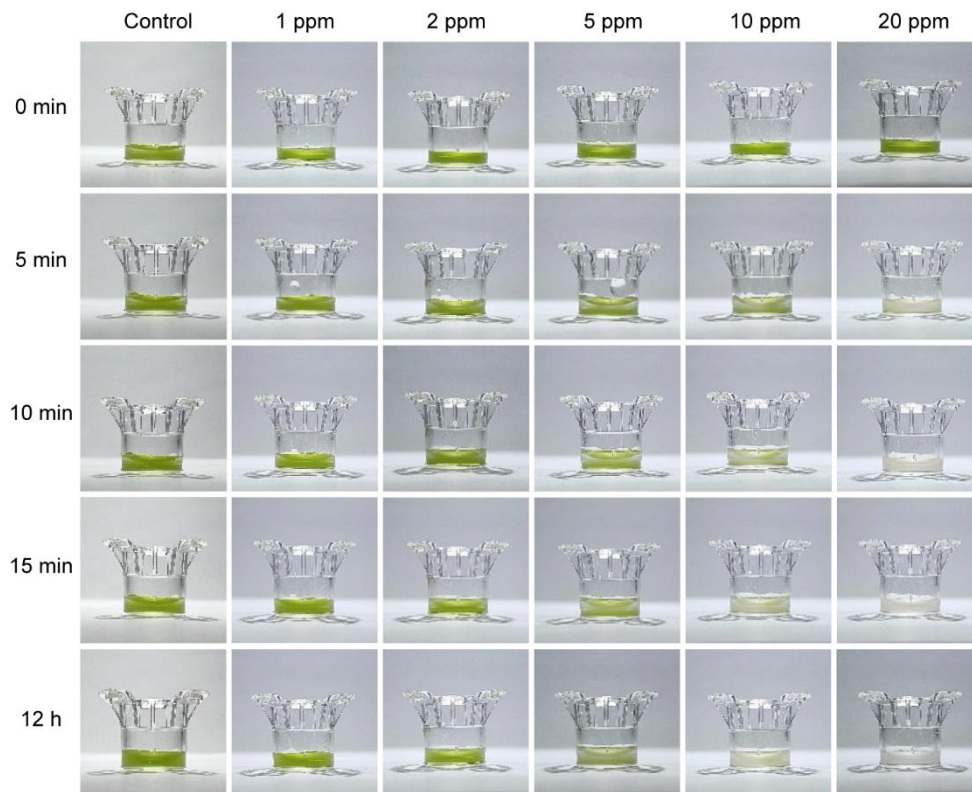

**Figure S10** Photographs of Chlorella hydrogels inactivated by chlorine dioxide. Chlorella concentration:  $1 \times 10^8$  cell/mL.

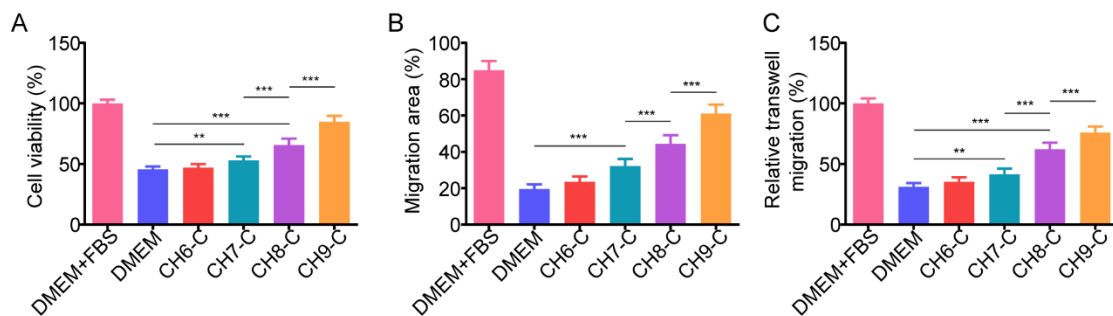

**Figure S11** Quantitative analysis of (A) L-929 cell proliferation, (B) HaCaT migration and (C) transwell migration of HUVEC by ImageJ software, 37 °C, dark,. Basic DMEM was selected as the cell culture medium. Data are presented as mean  $\pm$  SD ( $n = 5$ ); \*\*\* $P < 0.001$ , \*\* $P < 0.01$ , \* $P < 0.05$ , marked necessarily.

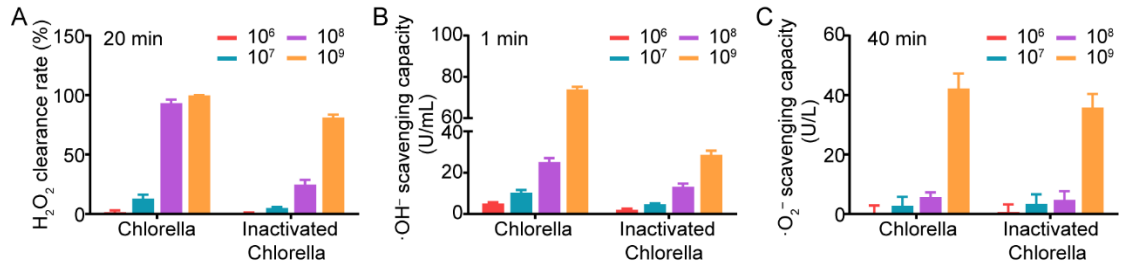

**Figure S12** The comparison of Chlorella and inactivated-Chlorella on the depletion of (A) H<sub>2</sub>O<sub>2</sub> and (B, C) the inhibition of ·OH<sup>-</sup>/·O<sub>2</sub><sup>-</sup> generation in BG-11 medium, respectively. The concentration of Chlorella was  $1 \times 10^6$ ,  $1 \times 10^7$ ,  $1 \times 10^8$  and  $1 \times 10^9$  cell/mL. Data are presented as mean  $\pm$  SD ( $n = 6$ ).

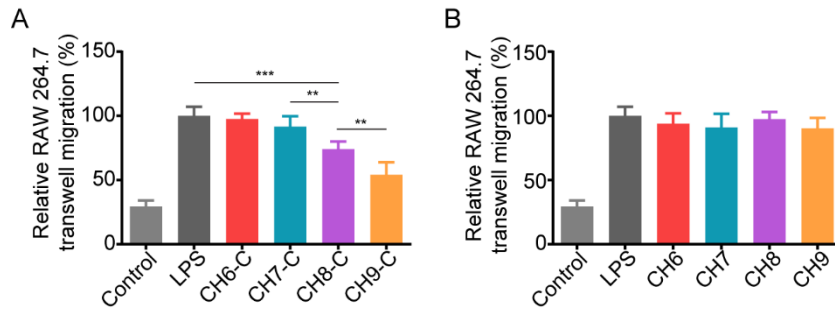

**Figure S13** Quantitative analysis of the effect of (A) inactivated-Chlorella hydrogels and (B) Chlorella hydrogels on RAW 264.7 cell transwell migration by ImageJ software. Data are presented as mean  $\pm$  SD ( $n = 5$ ); \*\*\* $P < 0.001$ , \*\* $P < 0.01$ , \* $P < 0.05$ , marked necessarily.

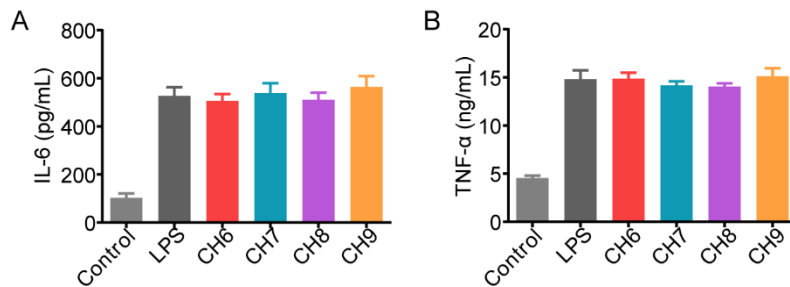

**Figure S14** The secretion of (A) IL-6 and (B) TNF- $\alpha$  by LPS-induced RAW 264.7 cells treated with Chlorella hydrogels. Data are presented as mean  $\pm$  SD ( $n = 6$ ).

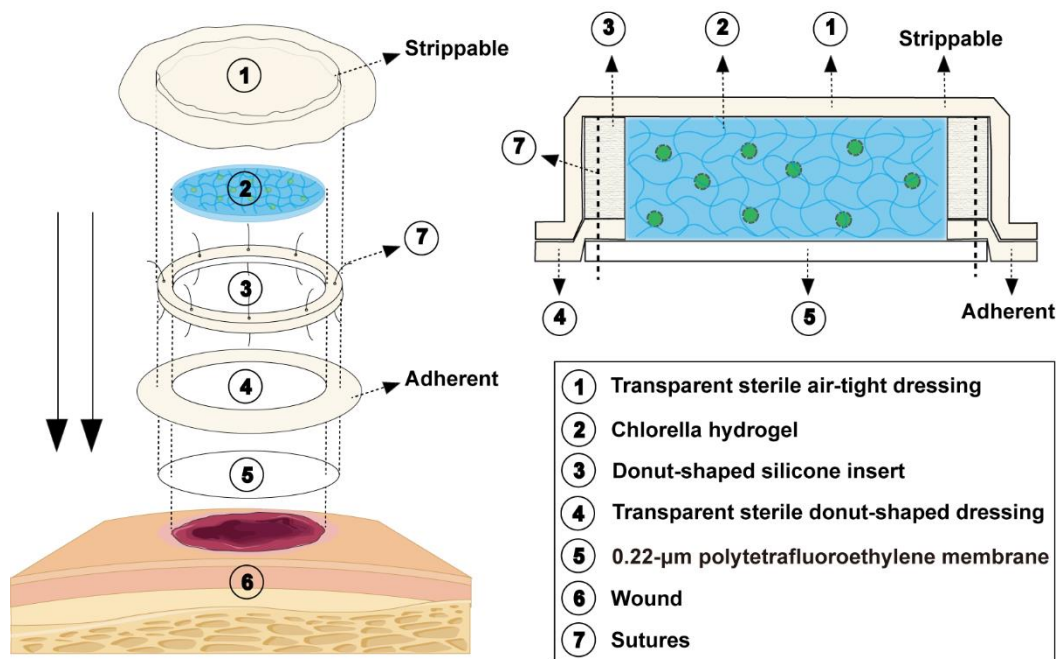

**Figure S15** Schematic diagram of the application of Chlorella hydrogels in the *in vivo* wound healing experiment. A transparent sterile air-tight dressing was used to reduce the leakage of oxygen. 0.22-µm polytetrafluoroethylene membrane was used to avoid the diffusion of Chlorella into the wound tissue. In the CH8-C group, the transparent sterile air-tight dressing was opened after 12 h illumination and the chlorine dioxide was secondary delivery, then the dressing was stuck again. Transparent sterile air-tight dressing and Chlorella hydrogels were renewed daily for all the groups.



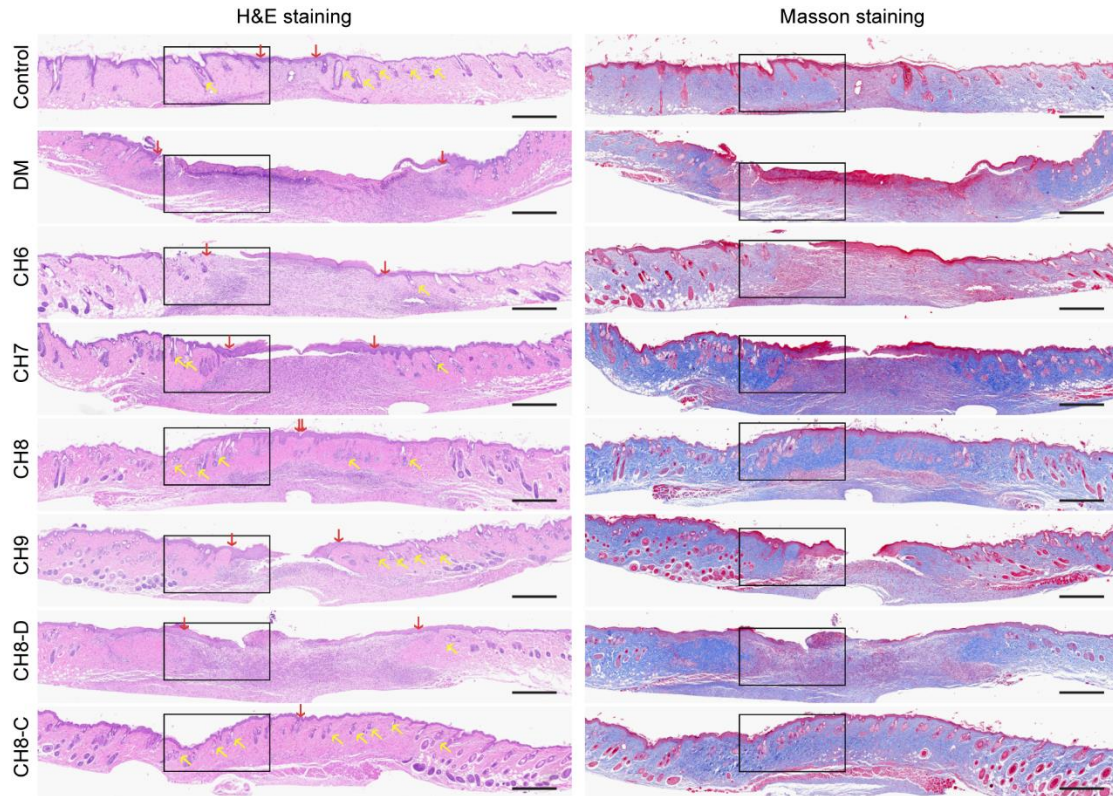

**Figure S16** Photographs of H&E staining and Masson staining. Black frame, the selected area in Fig. 7C and G; red arrow, granulation tissue gap; yellow arrow, hair follicle. Scar bar: 500  $\mu\text{m}$ .



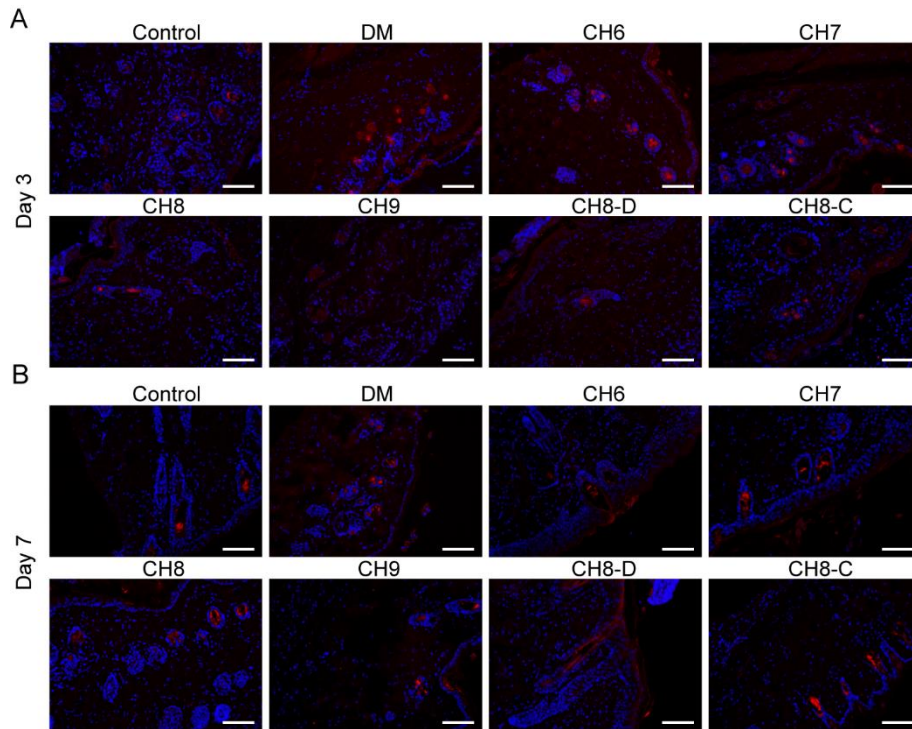

**Figure S17** Representative images of immunofluorescence staining of IL-6 (red) in the wound tissue on (A) Day 3 and (B) Day 7 after wounding. Scale bar: 100  $\mu$ m.

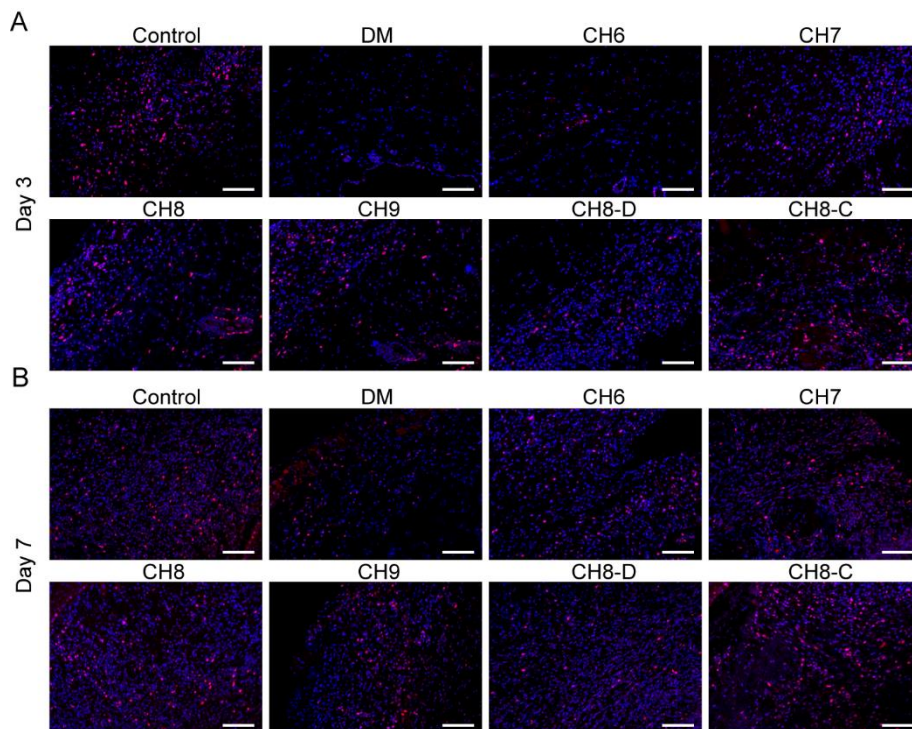

**Figure S18** Representative images of immunofluorescence staining of Ki67 (red) in the wound tissue on (A) Day 3 and (B) Day 7 after wounding. Scale bar: 100  $\mu$ m.

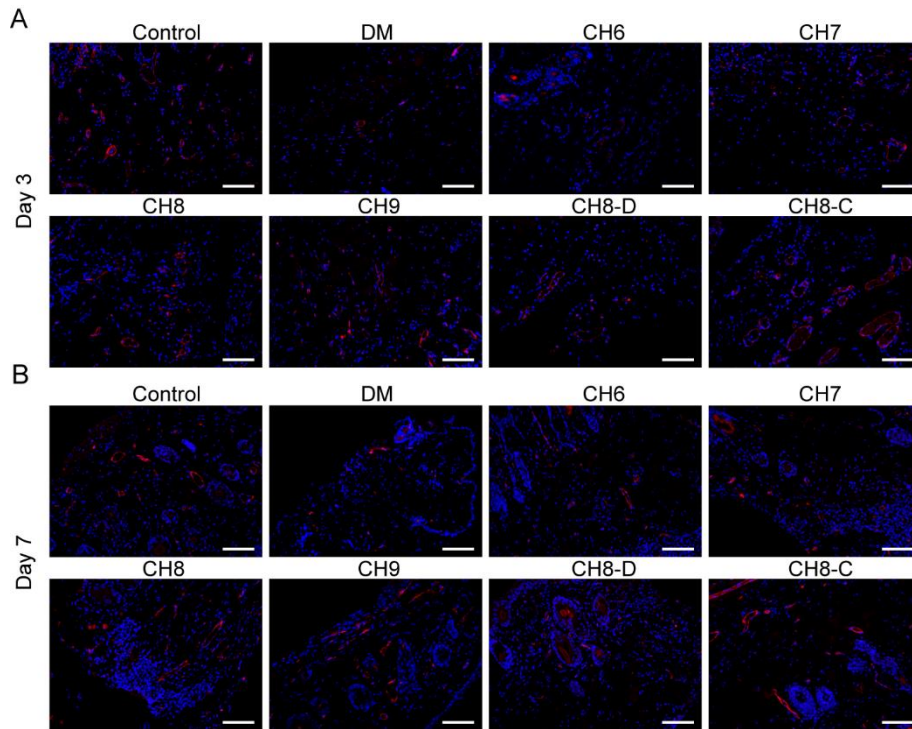

**Figure S19** Representative images of immunofluorescence staining of VEGF (red) in the wound tissue on (A) Day 3 and (B) Day 7 after wounding. Scale bar: 100 μm.

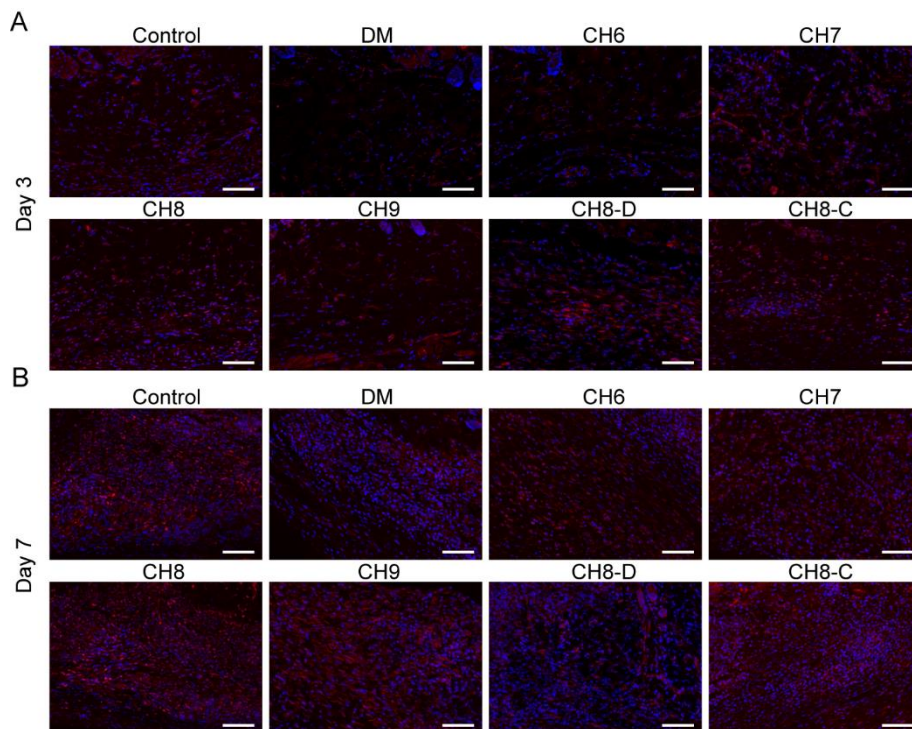

**Figure S20** Representative images of immunofluorescence staining of CD31 (red) in the wound tissue on (A) Day 3 and (B) Day 7 after wounding. Scale bar: 100 μm.
